# Supplementary material
Source: MDPI journal article supplement (https://www.mdpi.com/2071-1050/11/18/4933)
Supplement: s1 [file s1]

# A Framework for Assessing Modeling Performance and Effects of Rainfall-Catchment-Drainage Characteristics on Nutrient Urban Runoff in Poorly Gauged Watersheds

Angela Gorgoglione <sup>1,\*</sup>, Andrea Gioia <sup>2</sup> and Vito Iacobellis <sup>2</sup>

<sup>1</sup> Department of Fluid Mechanics and Environmental Engineering (IMFIA), School of Engineering, Universidad de la República, Montevideo 11300, Uruguay

<sup>2</sup> Department of Civil, Environmental, Land, Building Engineering and Chemistry (DICATECh), Politecnico di Bari, Bari 70126, Italy

\* Correspondence: agorgoglione@fing.edu.uy

## Contents:

**SM-1:** Generated rainfall time series obtained with IRP for SB and RP.

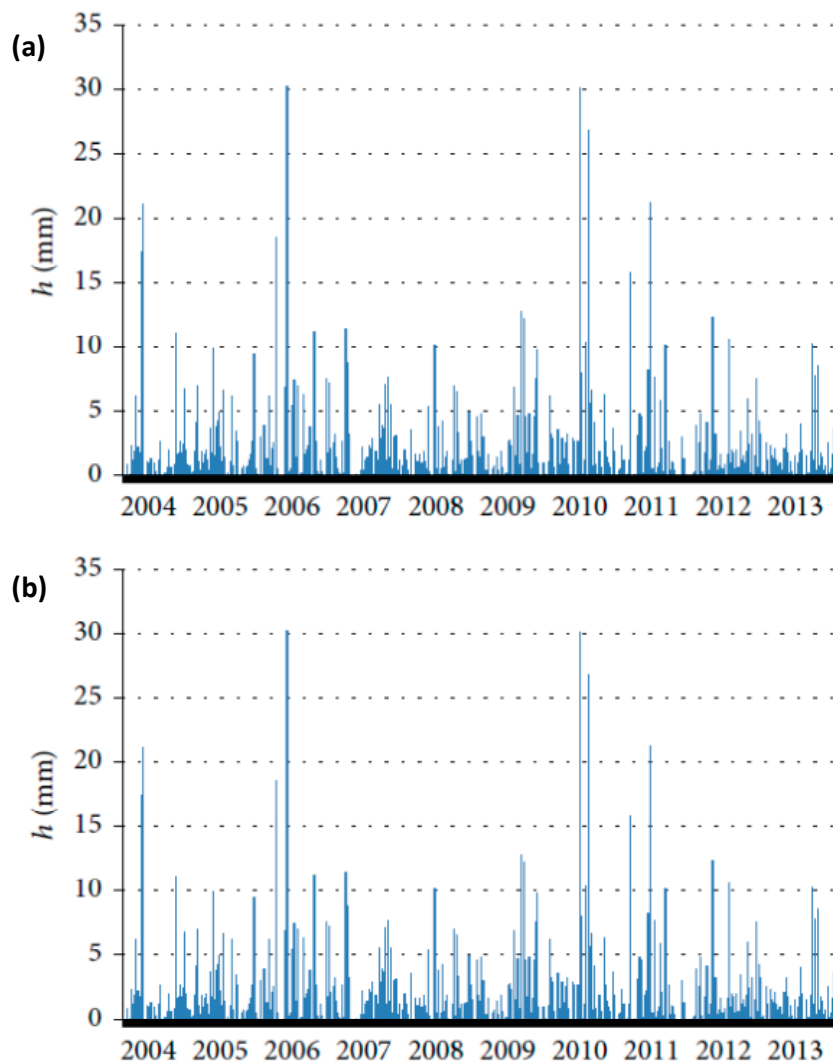

**SM-1:** Generated rainfall time series obtained with IRP for (a) SB and (b) RP.
